# Supplementary material for: In situ microwave-assisted solvothermal synthesis via morphological transformation of ZnCo2O4 3D nanoflowers and nanopetals to 1D nanowires for hybrid supercapacitors
Source: Royal Society of Chemistry journal article supplement (doi:10.1039/d0ra09507a), 2021-01-01
Supplement: d0ra09507a1.pdf [file d0ra09507a1.pdf]

## **In-situ microwave-assisted solvothermal synthesis of morphological transformation of ZnCo<sub>2</sub>O<sub>4</sub> 3D nanoflowers and nanopetals to 1D nanowires for hybrid supercapacitors**

Koyyada Ganesh <sup>a,¶</sup>, Nadavala Siva Kumar <sup>b,¶</sup>, Ibrahim H. Al.Ghurabi <sup>b</sup>, Mourad Boumaza<sup>b</sup>,  
Jae Hong Kim<sup>a</sup>, Koduru Mallikarjuna <sup>c,d,\*</sup>

<sup>a</sup> School of Chemical Engineering, Yeungnam University, 280 Daehak-ro Gyeongsan-si, Gyeongsangbuk-do, South Korea.

<sup>b</sup> Department of Chemical Engineering, King Saud University, P.O. Box 800, Riyadh, 11421, Saudi Arabia

<sup>c</sup> Department for Management of Science and Technology Development, Ton Duc Thang University, Ho Chi Minh City, Vietnam.

<sup>d</sup> Faculty of Applied Sciences, Ton Duc Thang University, Ho Chi Minh City, Vietnam

¶The authors are equally contributed

**Corresponding author Email:** [koduru.mallikarjuna@tdtu.edu.vn](mailto:koduru.mallikarjuna@tdtu.edu.vn)

## 1. Characterization

The crystallinity and facets formation of prepared ZCO/Ni were investigated through the X-ray diffractometer (XRD; PANalytical X'Pert Pro) operating at 40 kV and 30 mA with CuK $\alpha$  radiation ( $\lambda = 1.540 \text{ \AA}$ ). The morphology features like the size and shape of the grown structures were analyzed by a field emission SEM (FE-SEM). The high-resolution images were revealed through the transmission electron microscope (HR-TEM) were recorded using a field emission electron gun in Schottky mode operating at 200 kV. N<sub>2</sub> adsorption/desorption curves were recorded using a BET surface analyzer.

Electrochemical estimations were performed utilizing a mechanized electrochemical workstation (CHI 760 E, CH Instruments, USA) utilizing a three-anode arrangement at RT. In all tests, Ag/AgCl, Pt wire, and ZCO nanoflowers/nanowires Ni foam were utilized as the reference, counter, and working terminals, separately, and 3 M KOH arrangement was used as the dynamic/active electrolyte. Cyclic voltammetry (CV) and charge/release (CD) bends were gained and electrochemical impedance spectroscopy (EIS) was performed to explore the electrochemical exhibition of ZCO/Ni tests.
